# Supplementary material for: Analysis of mRNA and Long Non-Coding RNA Expression Profiles in Developing Yorkshire Pig Spleens
Source: MDPI journal article supplement (doi:10.3390/ani11102768), 2021-09-23
Supplement: s1 [file s1]

**Table S3. A list of top 10 up and down regulated protein coding genes with characters.**

| Y-90 vs Y-7 |             | Y-180 vs Y-7 |             | Y-180 vs Y-90 |             |
|-------------|-------------|--------------|-------------|---------------|-------------|
| Gene        | Fold change | Gene         | Fold change | Gene          | Fold change |
| HBB         | 3.8E+8      | HBB          | 4.3E+8      | LDLR          | 3.1E+6      |
| IGLV-4      | 2.2E+6      | IGLV-4       | 3.7E+6      | ZFX           | 2.5E+6      |
| KLRD1       | 1.5E+6      | LDLR         | 3.1E+6      | ALB           | 6.2E+1      |
| IGLV-10     | 1.4E+3      | ZFX          | 2.5E+6      | GP1BB         | 2.9E+1      |
| IGLV-9      | 5.8E+2      | AICDA        | 1.6E+6      | MRC2          | 6.5E+0      |
| IGLV-11     | 5.3E+2      | KLRD1        | 1.6E+6      | SLA-9         | 3.2E+0      |
| IGLV-7      | 5.0E+2      | IGLV-10      | 1.0E+4      | SLA-10        | 3.0E+0      |
| IGLV-8      | 2.2E+2      | IGLV-9       | 7.9E+2      | CXCL9         | 2.1E+0      |
| IGKV-7      | 2.2E+2      | IGLV-11      | 5.5E+2      | /             | /           |
| IGJ         | 2.1E+2      | IGLV-7       | 5.2E+2      | /             | /           |
| MS4A8B      | 6.0E-8      | KLF1         | 4.7E-8      | NMB           | 6.8E-7      |
| TSPO2       | 1.8E-7      | SPTA1        | 5.6E-8      | SPP1          | 8.6E-2      |
| ART5        | 2.5E-7      | MS4A8B       | 6.0E-8      | IGLV-2        | 2.7E-1      |
| CCDC42      | 4.6E-7      | SLC22A16     | 9.3E-8      | HSPA1A        | 3.5E-1      |
| TCN1        | 6.2E-7      | ADD2         | 1.4E-7      | HDAC9         | 3.7E-1      |
| TRIM50      | 6.5E-7      | TSPO2        | 1.8E-7      | IGKV-7        | 4.0E-1      |
| FAM150A     | 6.9E-7      | TNNI1        | 1.9E-7      | MARCO         | 4.0E-1      |
| PKLR        | 7.1E-7      | ART5         | 2.5E-7      | HSPH1         | 4.1E-1      |
| PDIA2       | 8.0E-7      | TCN1         | 6.2E-7      | SLA-3         | 4.1E-1      |
| HOXA1       | 9.2E-7      | TRIM50       | 6.5E-7      | IGKV-3        | 4.2E-1      |
