# Supplementary material for: Analysis of mRNA and Long Non-Coding RNA Expression Profiles in Developing Yorkshire Pig Spleens
Source: MDPI journal article supplement (doi:10.3390/ani11102768), 2021-09-23
Supplement: s1 [file s1]

**Table S2. Potential targeted differentially expressed genes of the 64 differentially expressed lncRNA transcripts.**

| <b>Y-90 vs Y-7</b>  | <b>Diff_target gene</b> | <b>Diff_target gene symbol</b> |
|---------------------|-------------------------|--------------------------------|
| ENSSSCT00000001325  | ENSSSCG00000001227      | TMP-SLA-3                      |
| ENSSSCT00000001326  | ENSSSCG00000001227      | TMP-SLA-3                      |
| ENSSSCT00000001337  | ENSSSCG00000001396      | SLA-8                          |
| ENSSSCT000000019857 | ENSSSCG000000018262     | SNORA53                        |
| ENSSSCT000000019904 | ENSSSCG000000018309     | SNORD17                        |
| ENSSSCT000000020277 | ENSSSCG000000018682     | SCARNA2                        |
| ENSSSCT000000020729 | ENSSSCG000000019134     | 7SK                            |
| ENSSSCT000000022100 | ENSSSCG000000020505     | SCARNA6                        |
| ENSSSCT000000027120 | ENSSSCG000000025419     | SNORA73                        |
| ENSSSCT000000028495 | ENSSSCG000000030376     | U1                             |
| ENSSSCT000000028495 | ENSSSCG000000026740     | U3                             |
| ENSSSCT000000034061 | ENSSSCG000000001228     | TMP-CH242-74M17.5              |
| ENSSSCT000000034907 | ENSSSCG000000030790     | TMP-CH242-74M17.6              |
| TCONS_00315059      | ENSSSCG000000001027     | BMP6                           |
| TCONS_00003833      | ENSSSCG000000004750     | -                              |
| TCONS_00391850      | ENSSSCG000000021943     | -                              |
| TCONS_00391850      | ENSSSCG000000017579     | -                              |
| TCONS_00190134      | ENSSSCG000000016475     | TRBC1                          |
| TCONS_00306779      | ENSSSCG000000001027     | BMP6                           |
| TCONS_00186792      | ENSSSCG000000016475     | TRBC1                          |
| TCONS_00228960      | ENSSSCG000000025858     | -                              |
| TCONS_00228961      | ENSSSCG000000025858     | -                              |
| TCONS_00350236      | ENSSSCG000000022192     | NCAPD3                         |
| TCONS_00004466      | ENSSSCG000000005372     | ANP32B                         |
| TCONS_00315059      | ENSSSCG000000027411     | -                              |
| TCONS_00228979      | ENSSSCG000000022403     | AHSP                           |
| TCONS_00391850      | ENSSSCG000000029074     | -                              |
| TCONS_00306779      | ENSSSCG000000027411     | -                              |
| TCONS_00020475      | ENSSSCG000000004399     | SLC22A16                       |
| <b>Y-180 vs Y-7</b> | <b>Diff_target gene</b> | <b>Diff_target gene symbol</b> |
| ENSSSCT00000001325  | ENSSSCG000000001227     | TMP-SLA-3                      |
| ENSSSCT00000001337  | ENSSSCG000000001396     | SLA-8                          |
| ENSSSCT000000019857 | ENSSSCG0000000018262    | SNORA53                        |
| ENSSSCT000000019904 | ENSSSCG0000000018309    | SNORD17                        |
| ENSSSCT000000020277 | ENSSSCG0000000018682    | SCARNA2                        |
| ENSSSCT000000020729 | ENSSSCG0000000019134    | 7SK                            |
| ENSSSCT000000022100 | ENSSSCG0000000020505    | SCARNA6                        |
| ENSSSCT000000034061 | ENSSSCG000000001228     | TMP-CH242-74M17.5              |
| ENSSSCT000000034907 | ENSSSCG0000000030790    | TMP-CH242-74M17.6              |

|                      |                         |                                |
|----------------------|-------------------------|--------------------------------|
| TCONS_00315059       | ENSSSCG00000001027      | BMP6                           |
| TCONS_00190134       | ENSSSCG000000016475     | TRBC1                          |
| TCONS_00306779       | ENSSSCG00000001027      | BMP6                           |
| TCONS_00186792       | ENSSSCG000000016475     | TRBC1                          |
| TCONS_00350236       | ENSSSCG000000022192     | NCAPD3                         |
| TCONS_00004466       | ENSSSCG000000005372     | ANP32B                         |
| ENSSSCT000000001335  | ENSSSCG000000001397     | TMP-CH242-74M17.4              |
| ENSSSCT000000001522  | ENSSSCG000000001396     | SLA-8                          |
| ENSSSCT000000001522  | ENSSSCG000000024161     | SLA-7                          |
| ENSSSCT000000024114  | ENSSSCG000000022489     | SNORA73                        |
| ENSSSCT000000024682  | ENSSSCG000000023048     | Metazoa_SRP                    |
| ENSSSCT000000025491  | ENSSSCG000000023855     | U3                             |
| ENSSSCT000000025491  | ENSSSCG000000017645     | TEX14                          |
| ENSSSCT000000034266  | ENSSSCG000000001397     | TMP-CH242-74M17.4              |
| ENSSSCT000000035587  | ENSSSCG000000001227     | TMP-SLA-3                      |
| TCONS_00228979       | ENSSSCG000000022403     | AHSP                           |
| TCONS_00020475       | ENSSSCG000000004399     | SLC22A16                       |
| <b>Y-180 vs Y-90</b> | <b>Diff_target gene</b> | <b>Diff_target gene symbol</b> |
| ENSSSCT000000001325  | ENSSSCG000000001227     | TMP-SLA-3                      |
| ENSSSCT000000001335  | ENSSSCG000000001397     | TMP-CH242-74M17.4              |
| ENSSSCT000000024114  | ENSSSCG000000022489     | SNORA73                        |
| ENSSSCT000000025491  | ENSSSCG000000023855     | U3                             |
| ENSSSCT000000030121  | ENSSSCG000000028335     | U3                             |
| ENSSSCT000000030121  | ENSSSCG000000026740     | U3                             |
| ENSSSCT000000034266  | ENSSSCG000000001397     | TMP-CH242-74M17.4              |
| ENSSSCT000000035587  | ENSSSCG000000001227     | TMP-SLA-3                      |
| ENSSSCT000000001326  | ENSSSCG000000001227     | TMP-SLA-3                      |
| ENSSSCT000000028495  | ENSSSCG000000028335     | U3                             |
| ENSSSCT000000028495  | ENSSSCG000000026740     | U3                             |
