# Supplementary material for: Analysis of mRNA and Long Non-Coding RNA Expression Profiles in Developing Yorkshire Pig Spleens
Source: MDPI journal article supplement (doi:10.3390/ani11102768), 2021-09-23
Supplement: s1 [file s1]

**Table S1. Primers used for quantitative PCR experiments.**

| LncRNA             | Forward (5'-3')           | Reverse (5'-3')       | Product length (bp) |
|--------------------|---------------------------|-----------------------|---------------------|
| ENSSSCT00000001325 | CGCGGGTACAGTCAGTTTG       | AGCGTGTTATTCCCCATCTCC | 206                 |
| ENSSSCT00000022100 | CGATGTCACAGTCCCTTCCC      | CCATGACCCACACACATGA   | 88                  |
| ENSSSCT00000028495 | CCTTCCCTGCCCTCAA          | CCGCTCCTCAGTCTCCT     | 180                 |
| ENSSSCT00000001337 | GAAGCCAATCAAGTCACCGC      | ACTGCGTGTCGTCCACATAG  | 243                 |
| ENSSSCT00000030121 | TGTAGAGCACCCGAAACC        | CACAGGCAACACCAAGAG    | 78                  |
| ENSSSCT00000001522 | TCGTTGCTGGTCTGGTTCTC      | GACTTGCGGGAGACACATCA  | 138                 |
| Gene               | Forward (5'-3')           | Reverse (5'-3')       | Product length (bp) |
| SOD1               | AAACATGGTGGGCCAAAGGA      | TTTCCACCTCTGCCCAAGTC  | 185                 |
| CD40               | TCCAGCGAATTCCTAGCCAC      | CAGAAACCTCTGTCGCCATCT | 229                 |
| CLU                | AGAGCTCCAGGAAATGTCCAC     | CCCTTCAGCTTTGTCTCGGT  | 204                 |
| CXCR4              | ACGGGTTCGGTATATTCAC TTCAG | CCCATGACCAGGATGACCAAT | 190                 |
| CXCL9              | TCAGTGGAACACCTACAGAAGTG   | TCATCCTTTGGCTGGTGTGA  | 160                 |
| ALB                | TCCACAAGGAATGCTGCCAT      | TCAGGTCTGCAGGCAATTCAT | 186                 |
| GAPDH              | ACGTGTCGGTTGTGGATCTG      | AAGTGGTCGTTGAGGGCAAT  | 205                 |
